# Supplementary material
Source: Springer Nature journal article supplement (https://www.springermedizin.de/resource/supplementary/12916_2012_751_MOESM2_ESM.pdf/9598250)

Menarche age (y)

18

15

12

9

6

12 kya

5 kya

1840

2010

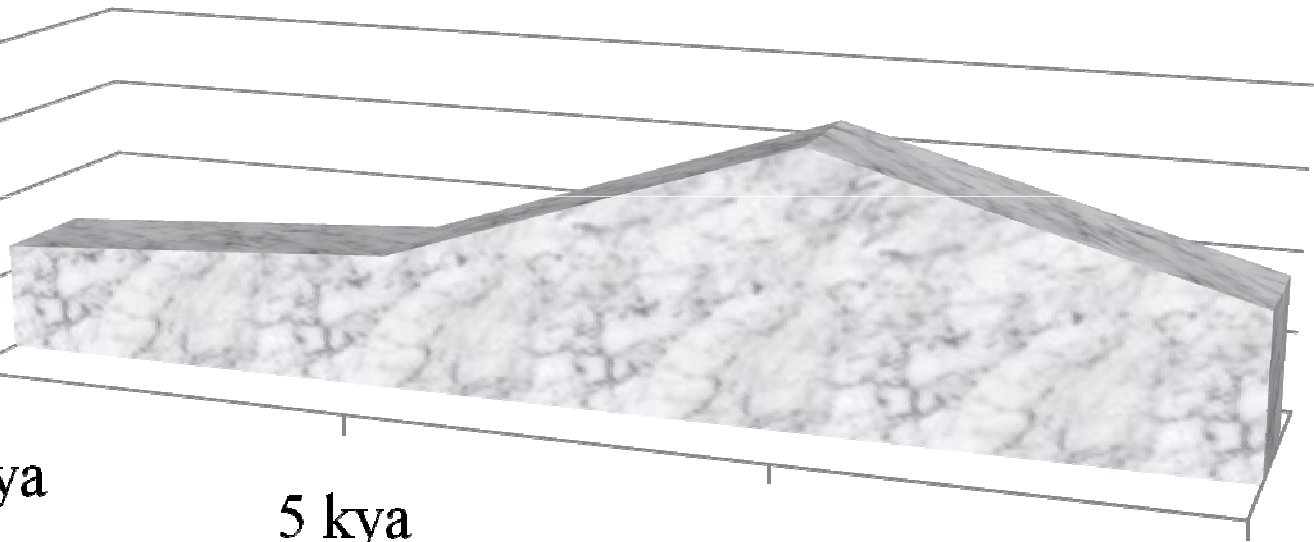

Supplement: MOESM2 [file 9598250]
